# Supplementary material for: Effect of Street Performance (Busking) on the Environmental Perception of Public Space
Source: PubMed Central journal article supplement (PMC8042224; doi:10.3389/fpsyg.2021.647863), 2021-03-30
Supplement: Data_Sheet_2.pdf [file Data_Sheet_2.pdf]

## Appendix B

### Multiple Comparisons with Tukey's HSD Post-hoc Tests

Change in Visitability (1 of 3)

| Space type         | Comparison space type    | Mean difference | Standard error | <i>p</i> value |
|--------------------|--------------------------|-----------------|----------------|----------------|
| Transport facility | Street                   | -0.37           | 0.21           | 0.835          |
|                    | Square                   | -0.51           | 0.21           | 0.408          |
|                    | Recreational space       | 0.13            | 0.21           | 1.000          |
|                    | Found neighborhood space | 0.10            | 0.22           | 1.000          |
|                    | Park                     | -0.10           | 0.21           | 1.000          |
|                    | Memorial                 | 0.87            | 0.22           | 0.003          |
|                    | Market                   | -0.27           | 0.22           | 0.985          |
|                    | Playground               | -0.19           | 0.21           | 0.999          |
|                    | Community open space     | -0.45           | 0.21           | 0.552          |
|                    | Indoor marketplace       | -0.05           | 0.22           | 1.000          |
|                    | Waterfront               | -0.58           | 0.22           | 0.258          |
| Street             | Transport facility       | 0.37            | 0.21           | 0.835          |
|                    | Square                   | -0.14           | 0.21           | 1.000          |
|                    | Recreational space       | 0.50            | 0.21           | 0.425          |
|                    | Found neighborhood space | 0.47            | 0.22           | 0.576          |
|                    | Park                     | 0.27            | 0.21           | 0.982          |
|                    | Memorial                 | 1.24            | 0.21           | 0.000          |
|                    | Market                   | 0.09            | 0.22           | 1.000          |
|                    | Playground               | 0.18            | 0.21           | 0.999          |
|                    | Community open space     | -0.08           | 0.21           | 1.000          |
|                    | Indoor marketplace       | 0.32            | 0.22           | 0.952          |
| Waterfront         | -0.21                    | 0.22            | 0.998          |                |
| Square             | Transport facility       | 0.51            | 0.21           | 0.408          |
|                    | Street                   | 0.14            | 0.21           | 1.000          |
|                    | Recreational space       | 0.64            | 0.21           | 0.114          |
|                    | Found neighborhood space | 0.62            | 0.22           | 0.199          |
|                    | Park                     | 0.41            | 0.22           | 0.756          |
|                    | Memorial                 | 1.38            | 0.22           | 0.000          |
|                    | Market                   | 0.24            | 0.22           | 0.996          |
|                    | Playground               | 0.32            | 0.21           | 0.938          |
|                    | Community open space     | 0.06            | 0.21           | 1.000          |
|                    | Indoor marketplace       | 0.47            | 0.23           | 0.653          |
| Waterfront         | -0.07                    | 0.22            | 1.000          |                |
| Recreational space | Transport facility       | -0.13           | 0.21           | 1.000          |
|                    | Street                   | -0.50           | 0.21           | 0.425          |
|                    | Square                   | -0.64           | 0.21           | 0.114          |
|                    | Found neighborhood space | -0.02           | 0.22           | 1.000          |
|                    | Park                     | -0.23           | 0.22           | 0.996          |
|                    | Memorial                 | 0.74            | 0.22           | 0.030          |
|                    | Market                   | -0.40           | 0.22           | 0.805          |
|                    | Playground               | -0.32           | 0.21           | 0.938          |
|                    | Community open space     | -0.58           | 0.21           | 0.179          |
|                    | Indoor marketplace       | -0.17           | 0.22           | 1.000          |
| Waterfront         | -0.71                    | 0.22            | 0.061          |                |

Change in Visitability (2 of 3)

| Space type               | Comparison space type    | Mean difference | Standard error | <i>p</i> value |
|--------------------------|--------------------------|-----------------|----------------|----------------|
| Found neighborhood space | Transport facility       | -0.10           | 0.22           | 1.000          |
|                          | Street                   | -0.47           | 0.22           | 0.576          |
|                          | Square                   | -0.62           | 0.22           | 0.199          |
|                          | Recreational space       | 0.02            | 0.22           | 1.000          |
|                          | Park                     | -0.20           | 0.22           | 0.999          |
|                          | Memorial                 | 0.77            | 0.23           | 0.034          |
|                          | Market                   | -0.38           | 0.23           | 0.890          |
|                          | Playground               | -0.30           | 0.22           | 0.974          |
|                          | Community open space     | -0.56           | 0.22           | 0.295          |
|                          | Indoor marketplace       | -0.15           | 0.23           | 1.000          |
| Park                     | Waterfront               | -0.69           | 0.23           | 0.114          |
|                          | Transport facility       | 0.10            | 0.21           | 1.000          |
|                          | Street                   | -0.27           | 0.21           | 0.982          |
|                          | Square                   | -0.41           | 0.22           | 0.756          |
|                          | Recreational space       | 0.23            | 0.22           | 0.996          |
|                          | Found neighborhood space | 0.20            | 0.22           | 0.999          |
|                          | Memorial                 | 0.97            | 0.22           | 0.001          |
|                          | Market                   | -0.18           | 0.22           | 1.000          |
|                          | Playground               | -0.09           | 0.21           | 1.000          |
|                          | Community open space     | -0.36           | 0.21           | 0.873          |
| Memorial                 | Indoor marketplace       | 0.05            | 0.23           | 1.000          |
|                          | Waterfront               | -0.48           | 0.22           | 0.579          |
|                          | Transport facility       | -0.87           | 0.22           | 0.003          |
|                          | Street                   | -1.24           | 0.21           | 0.000          |
|                          | Square                   | -1.38           | 0.22           | 0.000          |
|                          | Recreational space       | -0.74           | 0.22           | 0.030          |
|                          | Found neighborhood space | -0.77           | 0.23           | 0.034          |
|                          | Park                     | -0.97           | 0.22           | 0.001          |
|                          | Market                   | -1.15           | 0.23           | 0.000          |
|                          | Playground               | -1.06           | 0.22           | 0.000          |
| Market                   | Community open space     | -1.33           | 0.21           | 0.000          |
|                          | Indoor marketplace       | -0.92           | 0.23           | 0.004          |
|                          | Waterfront               | -1.45           | 0.23           | 0.000          |
|                          | Transport facility       | 0.27            | 0.22           | 0.985          |
|                          | Street                   | -0.09           | 0.22           | 1.000          |
|                          | Square                   | -0.24           | 0.22           | 0.996          |
|                          | Recreational space       | 0.40            | 0.22           | 0.805          |
|                          | Found neighborhood space | 0.38            | 0.23           | 0.890          |
|                          | Park                     | 0.18            | 0.22           | 1.000          |
|                          | Memorial                 | 1.15            | 0.23           | 0.000          |
| Market                   | Playground               | 0.08            | 0.22           | 1.000          |
|                          | Community open space     | -0.18           | 0.22           | 1.000          |
|                          | Indoor marketplace       | 0.23            | 0.23           | 0.998          |
|                          | Waterfront               | -0.31           | 0.23           | 0.974          |

Change in Visitability (3 of 3)

| Space type           | Comparison space type    | Mean difference | Standard error | <i>p</i> value |
|----------------------|--------------------------|-----------------|----------------|----------------|
| Playground           | Transport facility       | 0.19            | 0.21           | 0.999          |
|                      | Street                   | -0.18           | 0.21           | 0.999          |
|                      | Square                   | -0.32           | 0.21           | 0.938          |
|                      | Recreational space       | 0.32            | 0.21           | 0.938          |
|                      | Found neighborhood space | 0.30            | 0.22           | 0.974          |
|                      | Park                     | 0.09            | 0.21           | 1.000          |
|                      | Memorial                 | 1.06            | 0.22           | 0.000          |
|                      | Market                   | -0.08           | 0.22           | 1.000          |
|                      | Community open space     | -0.26           | 0.21           | 0.982          |
|                      | Indoor marketplace       | 0.14            | 0.22           | 1.000          |
|                      | Waterfront               | -0.39           | 0.22           | 0.829          |
| Community open space | Transport facility       | 0.45            | 0.21           | 0.552          |
|                      | Street                   | 0.08            | 0.21           | 1.000          |
|                      | Square                   | -0.06           | 0.21           | 1.000          |
|                      | Recreational space       | 0.58            | 0.21           | 0.179          |
|                      | Found neighborhood space | 0.56            | 0.22           | 0.295          |
|                      | Park                     | 0.36            | 0.21           | 0.873          |
|                      | Memorial                 | 1.33            | 0.21           | 0.000          |
|                      | Market                   | 0.18            | 0.22           | 1.000          |
|                      | Playground               | 0.26            | 0.21           | 0.982          |
|                      | Indoor marketplace       | 0.41            | 0.22           | 0.787          |
|                      | Waterfront               | -0.13           | 0.22           | 1.000          |
| Indoor marketplace   | Transport facility       | 0.05            | 0.22           | 1.000          |
|                      | Street                   | -0.32           | 0.22           | 0.952          |
|                      | Square                   | -0.47           | 0.23           | 0.653          |
|                      | Recreational space       | 0.17            | 0.22           | 1.000          |
|                      | Found neighborhood space | 0.15            | 0.23           | 1.000          |
|                      | Park                     | -0.05           | 0.23           | 1.000          |
|                      | Memorial                 | 0.92            | 0.23           | 0.004          |
|                      | Market                   | -0.23           | 0.23           | 0.998          |
|                      | Playground               | -0.14           | 0.22           | 1.000          |
|                      | Community open space     | -0.41           | 0.22           | 0.787          |
|                      | Waterfront               | -0.54           | 0.23           | 0.476          |
| Waterfront           | Transport facility       | 0.58            | 0.22           | 0.258          |
|                      | Street                   | 0.21            | 0.22           | 0.998          |
|                      | Square                   | 0.07            | 0.22           | 1.000          |
|                      | Recreational space       | 0.71            | 0.22           | 0.061          |
|                      | Found neighborhood space | 0.69            | 0.23           | 0.114          |
|                      | Park                     | 0.48            | 0.22           | 0.579          |
|                      | Memorial                 | 1.45            | 0.23           | 0.000          |
|                      | Market                   | 0.31            | 0.23           | 0.974          |
|                      | Playground               | 0.39            | 0.22           | 0.829          |
|                      | Community open space     | 0.13            | 0.22           | 1.000          |
|                      | Indoor marketplace       | 0.54            | 0.23           | 0.476          |

Change in Restorativeness (1 of 3)

| Space type         | Comparison space type    | Mean difference | Standard error | <i>p</i> value |
|--------------------|--------------------------|-----------------|----------------|----------------|
| Transport facility | Street                   | -0.28           | 0.22           | 0.978          |
|                    | Square                   | -0.38           | 0.22           | 0.856          |
|                    | Recreational space       | -0.05           | 0.22           | 1.000          |
|                    | Found neighborhood space | 0.00            | 0.23           | 1.000          |
|                    | Park                     | -0.06           | 0.22           | 1.000          |
|                    | Memorial                 | 0.60            | 0.22           | 0.237          |
|                    | Market                   | -0.04           | 0.23           | 1.000          |
|                    | Playground               | -0.17           | 0.22           | 1.000          |
|                    | Community open space     | -0.29           | 0.21           | 0.971          |
|                    | Indoor marketplace       | -0.01           | 0.23           | 1.000          |
| Street             | Waterfront               | -0.39           | 0.23           | 0.865          |
|                    | Transport facility       | 0.28            | 0.22           | 0.978          |
|                    | Square                   | -0.10           | 0.22           | 1.000          |
|                    | Recreational space       | 0.24            | 0.22           | 0.995          |
|                    | Found neighborhood space | 0.28            | 0.23           | 0.984          |
|                    | Park                     | 0.22            | 0.22           | 0.998          |
|                    | Memorial                 | 0.88            | 0.22           | 0.004          |
|                    | Market                   | 0.24            | 0.23           | 0.995          |
|                    | Playground               | 0.11            | 0.22           | 1.000          |
|                    | Community open space     | -0.01           | 0.21           | 1.000          |
| Square             | Indoor marketplace       | 0.27            | 0.23           | 0.990          |
|                    | Waterfront               | -0.11           | 0.23           | 1.000          |
|                    | Transport facility       | 0.38            | 0.22           | 0.856          |
|                    | Street                   | 0.10            | 0.22           | 1.000          |
|                    | Recreational space       | 0.33            | 0.22           | 0.938          |
|                    | Found neighborhood space | 0.38            | 0.23           | 0.886          |
|                    | Park                     | 0.32            | 0.22           | 0.960          |
|                    | Memorial                 | 0.98            | 0.23           | 0.001          |
|                    | Market                   | 0.34            | 0.23           | 0.944          |
|                    | Playground               | 0.21            | 0.22           | 0.999          |
| Recreational space | Community open space     | 0.09            | 0.22           | 1.000          |
|                    | Indoor marketplace       | 0.37            | 0.23           | 0.915          |
|                    | Waterfront               | -0.01           | 0.23           | 1.000          |
|                    | Transport facility       | 0.05            | 0.22           | 1.000          |
|                    | Street                   | -0.24           | 0.22           | 0.995          |
|                    | Square                   | -0.33           | 0.22           | 0.938          |
|                    | Found neighborhood space | 0.05            | 0.23           | 1.000          |
|                    | Park                     | -0.01           | 0.22           | 1.000          |
|                    | Memorial                 | 0.64            | 0.22           | 0.149          |
|                    | Market                   | 0.01            | 0.23           | 1.000          |
| Waterfront         | Playground               | -0.13           | 0.22           | 1.000          |
|                    | Community open space     | -0.24           | 0.21           | 0.993          |
|                    | Indoor marketplace       | 0.04            | 0.23           | 1.000          |
|                    | Waterfront               | -0.34           | 0.23           | 0.942          |

Change in Restorativeness (2 of 3)

| Space type               | Comparison space type    | Mean difference | Standard error | <i>p</i> value |
|--------------------------|--------------------------|-----------------|----------------|----------------|
| Found neighborhood space | Transport facility       | 0.00            | 0.23           | 1.000          |
|                          | Street                   | -0.28           | 0.23           | 0.984          |
|                          | Square                   | -0.38           | 0.23           | 0.886          |
|                          | Recreational space       | -0.05           | 0.23           | 1.000          |
|                          | Park                     | -0.06           | 0.23           | 1.000          |
|                          | Memorial                 | 0.59            | 0.23           | 0.306          |
|                          | Market                   | -0.04           | 0.24           | 1.000          |
|                          | Playground               | -0.18           | 0.23           | 1.000          |
|                          | Community open space     | -0.29           | 0.22           | 0.979          |
|                          | Indoor marketplace       | -0.01           | 0.24           | 1.000          |
| Park                     | Waterfront               | -0.39           | 0.24           | 0.893          |
|                          | Transport facility       | 0.06            | 0.22           | 1.000          |
|                          | Street                   | -0.22           | 0.22           | 0.998          |
|                          | Square                   | -0.32           | 0.22           | 0.960          |
|                          | Recreational space       | 0.01            | 0.22           | 1.000          |
|                          | Found neighborhood space | 0.06            | 0.23           | 1.000          |
|                          | Memorial                 | 0.66            | 0.23           | 0.141          |
|                          | Market                   | 0.02            | 0.23           | 1.000          |
|                          | Playground               | -0.11           | 0.22           | 1.000          |
|                          | Community open space     | -0.23           | 0.22           | 0.997          |
| Memorial                 | Indoor marketplace       | 0.05            | 0.23           | 1.000          |
|                          | Waterfront               | -0.33           | 0.23           | 0.961          |
|                          | Transport facility       | -0.60           | 0.22           | 0.237          |
|                          | Street                   | -0.88           | 0.22           | 0.004          |
|                          | Square                   | -0.98           | 0.23           | 0.001          |
|                          | Recreational space       | -0.64           | 0.22           | 0.149          |
|                          | Found neighborhood space | -0.59           | 0.23           | 0.306          |
|                          | Park                     | -0.66           | 0.23           | 0.141          |
|                          | Market                   | -0.63           | 0.23           | 0.215          |
|                          | Playground               | -0.77           | 0.22           | 0.028          |
| Market                   | Community open space     | -0.88           | 0.22           | 0.003          |
|                          | Indoor marketplace       | -0.61           | 0.24           | 0.298          |
|                          | Waterfront               | -0.98           | 0.23           | 0.002          |
|                          | Transport facility       | 0.04            | 0.23           | 1.000          |
|                          | Street                   | -0.24           | 0.23           | 0.995          |
|                          | Square                   | -0.34           | 0.23           | 0.944          |
|                          | Recreational space       | -0.01           | 0.23           | 1.000          |
|                          | Found neighborhood space | 0.04            | 0.24           | 1.000          |
|                          | Park                     | -0.02           | 0.23           | 1.000          |
|                          | Memorial                 | 0.63            | 0.23           | 0.215          |
| Market                   | Playground               | -0.14           | 0.23           | 1.000          |
|                          | Community open space     | -0.25           | 0.22           | 0.993          |
|                          | Indoor marketplace       | 0.03            | 0.24           | 1.000          |
|                          | Waterfront               | -0.35           | 0.24           | 0.946          |

Change in Restorativeness (3 of 3)

| Space type           | Comparison space type    | Mean difference | Standard error | <i>p</i> value |
|----------------------|--------------------------|-----------------|----------------|----------------|
| Playground           | Transport facility       | 0.17            | 0.22           | 1.000          |
|                      | Street                   | -0.11           | 0.22           | 1.000          |
|                      | Square                   | -0.21           | 0.22           | 0.999          |
|                      | Recreational space       | 0.13            | 0.22           | 1.000          |
|                      | Found neighborhood space | 0.18            | 0.23           | 1.000          |
|                      | Park                     | 0.11            | 0.22           | 1.000          |
|                      | Memorial                 | 0.77            | 0.22           | 0.028          |
|                      | Market                   | 0.14            | 0.23           | 1.000          |
|                      | Community open space     | -0.12           | 0.21           | 1.000          |
|                      | Indoor marketplace       | 0.16            | 0.23           | 1.000          |
|                      | Waterfront               | -0.21           | 0.23           | 0.999          |
| Community open space | Transport facility       | 0.29            | 0.21           | 0.971          |
|                      | Street                   | 0.01            | 0.21           | 1.000          |
|                      | Square                   | -0.09           | 0.22           | 1.000          |
|                      | Recreational space       | 0.24            | 0.21           | 0.993          |
|                      | Found neighborhood space | 0.29            | 0.22           | 0.979          |
|                      | Park                     | 0.23            | 0.22           | 0.997          |
|                      | Memorial                 | 0.88            | 0.22           | 0.003          |
|                      | Market                   | 0.25            | 0.22           | 0.993          |
|                      | Playground               | 0.12            | 0.21           | 1.000          |
|                      | Indoor marketplace       | 0.28            | 0.23           | 0.987          |
|                      | Waterfront               | -0.10           | 0.22           | 1.000          |
| Indoor marketplace   | Transport facility       | 0.01            | 0.23           | 1.000          |
|                      | Street                   | -0.27           | 0.23           | 0.990          |
|                      | Square                   | -0.37           | 0.23           | 0.915          |
|                      | Recreational space       | -0.04           | 0.23           | 1.000          |
|                      | Found neighborhood space | 0.01            | 0.24           | 1.000          |
|                      | Park                     | -0.05           | 0.23           | 1.000          |
|                      | Memorial                 | 0.61            | 0.24           | 0.298          |
|                      | Market                   | -0.03           | 0.24           | 1.000          |
|                      | Playground               | -0.16           | 0.23           | 1.000          |
|                      | Community open space     | -0.28           | 0.23           | 0.987          |
|                      | Waterfront               | -0.38           | 0.24           | 0.919          |
| Waterfront           | Transport facility       | 0.39            | 0.23           | 0.865          |
|                      | Street                   | 0.11            | 0.23           | 1.000          |
|                      | Square                   | 0.01            | 0.23           | 1.000          |
|                      | Recreational space       | 0.34            | 0.23           | 0.942          |
|                      | Found neighborhood space | 0.39            | 0.24           | 0.893          |
|                      | Park                     | 0.33            | 0.23           | 0.961          |
|                      | Memorial                 | 0.98            | 0.23           | 0.002          |
|                      | Market                   | 0.35            | 0.24           | 0.946          |
|                      | Playground               | 0.21            | 0.23           | 0.999          |
|                      | Community open space     | 0.10            | 0.22           | 1.000          |
|                      | Indoor marketplace       | 0.38            | 0.24           | 0.919          |

Change in Preference (1 of 3)

| Space type         | Comparison space type    | Mean difference | Standard error | <i>p</i> value |
|--------------------|--------------------------|-----------------|----------------|----------------|
| Transport facility | Street                   | -0.28           | 0.22           | 0.980          |
|                    | Square                   | -0.31           | 0.22           | 0.967          |
|                    | Recreational space       | 0.26            | 0.22           | 0.991          |
|                    | Found neighborhood space | 0.30            | 0.23           | 0.977          |
|                    | Park                     | 0.05            | 0.22           | 1.000          |
|                    | Memorial                 | 1.08            | 0.22           | 0.000          |
|                    | Market                   | -0.13           | 0.23           | 1.000          |
|                    | Playground               | 0.01            | 0.22           | 1.000          |
|                    | Community open space     | -0.38           | 0.22           | 0.837          |
|                    | Indoor marketplace       | -0.12           | 0.23           | 1.000          |
| Street             | Waterfront               | -0.37           | 0.23           | 0.902          |
|                    | Transport facility       | 0.28            | 0.22           | 0.980          |
|                    | Square                   | -0.03           | 0.22           | 1.000          |
|                    | Recreational space       | 0.54            | 0.22           | 0.363          |
|                    | Found neighborhood space | 0.58            | 0.23           | 0.305          |
|                    | Park                     | 0.33            | 0.22           | 0.947          |
|                    | Memorial                 | 1.36            | 0.22           | 0.000          |
|                    | Market                   | 0.16            | 0.23           | 1.000          |
|                    | Playground               | 0.29            | 0.22           | 0.973          |
|                    | Community open space     | -0.10           | 0.21           | 1.000          |
| Square             | Indoor marketplace       | 0.17            | 0.23           | 1.000          |
|                    | Waterfront               | -0.09           | 0.23           | 1.000          |
|                    | Transport facility       | 0.31            | 0.22           | 0.967          |
|                    | Street                   | 0.03            | 0.22           | 1.000          |
|                    | Recreational space       | 0.56            | 0.22           | 0.325          |
|                    | Found neighborhood space | 0.61            | 0.23           | 0.272          |
|                    | Park                     | 0.35            | 0.23           | 0.924          |
|                    | Memorial                 | 1.39            | 0.23           | 0.000          |
|                    | Market                   | 0.18            | 0.23           | 1.000          |
|                    | Playground               | 0.32            | 0.22           | 0.957          |
| Recreational space | Community open space     | -0.07           | 0.22           | 1.000          |
|                    | Indoor marketplace       | 0.19            | 0.24           | 1.000          |
|                    | Waterfront               | -0.06           | 0.23           | 1.000          |
|                    | Transport facility       | -0.26           | 0.22           | 0.991          |
|                    | Street                   | -0.54           | 0.22           | 0.363          |
|                    | Square                   | -0.56           | 0.22           | 0.325          |
|                    | Found neighborhood space | 0.05            | 0.23           | 1.000          |
|                    | Park                     | -0.21           | 0.22           | 0.999          |
|                    | Memorial                 | 0.83            | 0.23           | 0.014          |
|                    | Market                   | -0.38           | 0.23           | 0.884          |
| Waterfront         | Playground               | -0.25           | 0.22           | 0.994          |
|                    | Community open space     | -0.64           | 0.22           | 0.127          |
|                    | Indoor marketplace       | -0.37           | 0.23           | 0.910          |
|                    | Waterfront               | -0.63           | 0.23           | 0.214          |

Change in Preference (2 of 3)

| Space type               | Comparison space type    | Mean difference | Standard error | <i>p</i> value |
|--------------------------|--------------------------|-----------------|----------------|----------------|
| Found neighborhood space | Transport facility       | -0.30           | 0.23           | 0.977          |
|                          | Street                   | -0.58           | 0.23           | 0.305          |
|                          | Square                   | -0.61           | 0.23           | 0.272          |
|                          | Recreational space       | -0.05           | 0.23           | 1.000          |
|                          | Park                     | -0.26           | 0.23           | 0.995          |
|                          | Memorial                 | 0.78            | 0.23           | 0.043          |
|                          | Market                   | -0.43           | 0.24           | 0.825          |
|                          | Playground               | -0.29           | 0.23           | 0.983          |
|                          | Community open space     | -0.68           | 0.23           | 0.106          |
|                          | Indoor marketplace       | -0.42           | 0.24           | 0.858          |
| Park                     | Waterfront               | -0.67           | 0.24           | 0.177          |
|                          | Transport facility       | -0.05           | 0.22           | 1.000          |
|                          | Street                   | -0.33           | 0.22           | 0.947          |
|                          | Square                   | -0.35           | 0.23           | 0.924          |
|                          | Recreational space       | 0.21            | 0.22           | 0.999          |
|                          | Found neighborhood space | 0.26            | 0.23           | 0.995          |
|                          | Memorial                 | 1.04            | 0.23           | 0.000          |
|                          | Market                   | -0.17           | 0.23           | 1.000          |
|                          | Playground               | -0.03           | 0.22           | 1.000          |
|                          | Community open space     | -0.43           | 0.22           | 0.735          |
| Memorial                 | Indoor marketplace       | -0.16           | 0.24           | 1.000          |
|                          | Waterfront               | -0.42           | 0.23           | 0.825          |
|                          | Transport facility       | -1.08           | 0.22           | 0.000          |
|                          | Street                   | -1.36           | 0.22           | 0.000          |
|                          | Square                   | -1.39           | 0.23           | 0.000          |
|                          | Recreational space       | -0.83           | 0.23           | 0.014          |
|                          | Found neighborhood space | -0.78           | 0.23           | 0.043          |
|                          | Park                     | -1.04           | 0.23           | 0.000          |
|                          | Market                   | -1.21           | 0.23           | 0.000          |
|                          | Playground               | -1.07           | 0.22           | 0.000          |
| Market                   | Community open space     | -1.46           | 0.22           | 0.000          |
|                          | Indoor marketplace       | -1.20           | 0.24           | 0.000          |
|                          | Waterfront               | -1.46           | 0.23           | 0.000          |
|                          | Transport facility       | 0.13            | 0.23           | 1.000          |
|                          | Street                   | -0.16           | 0.23           | 1.000          |
|                          | Square                   | -0.18           | 0.23           | 1.000          |
|                          | Recreational space       | 0.38            | 0.23           | 0.884          |
|                          | Found neighborhood space | 0.43            | 0.24           | 0.825          |
|                          | Park                     | 0.17            | 0.23           | 1.000          |
|                          | Memorial                 | 1.21            | 0.23           | 0.000          |
| Market                   | Playground               | 0.14            | 0.23           | 1.000          |
|                          | Community open space     | -0.25           | 0.23           | 0.994          |
|                          | Indoor marketplace       | 0.01            | 0.24           | 1.000          |
|                          | Waterfront               | -0.25           | 0.24           | 0.997          |



Change in Preference (3 of 3)

| Space type           | Comparison space type    | Mean difference | Standard error | <i>p</i> value |
|----------------------|--------------------------|-----------------|----------------|----------------|
| Playground           | Transport facility       | -0.01           | 0.22           | 1.000          |
|                      | Street                   | -0.29           | 0.22           | 0.973          |
|                      | Square                   | -0.32           | 0.22           | 0.957          |
|                      | Recreational space       | 0.25            | 0.22           | 0.994          |
|                      | Found neighborhood space | 0.29            | 0.23           | 0.983          |
|                      | Park                     | 0.03            | 0.22           | 1.000          |
|                      | Memorial                 | 1.07            | 0.22           | 0.000          |
|                      | Market                   | -0.14           | 0.23           | 1.000          |
|                      | Community open space     | -0.39           | 0.22           | 0.809          |
|                      | Indoor marketplace       | -0.13           | 0.23           | 1.000          |
|                      | Waterfront               | -0.38           | 0.23           | 0.882          |
| Community open space | Transport facility       | 0.38            | 0.22           | 0.837          |
|                      | Street                   | 0.10            | 0.21           | 1.000          |
|                      | Square                   | 0.07            | 0.22           | 1.000          |
|                      | Recreational space       | 0.64            | 0.22           | 0.127          |
|                      | Found neighborhood space | 0.68            | 0.23           | 0.106          |
|                      | Park                     | 0.43            | 0.22           | 0.735          |
|                      | Memorial                 | 1.46            | 0.22           | 0.000          |
|                      | Market                   | 0.25            | 0.23           | 0.994          |
|                      | Playground               | 0.39            | 0.22           | 0.809          |
|                      | Indoor marketplace       | 0.26            | 0.23           | 0.992          |
|                      | Waterfront               | 0.01            | 0.23           | 1.000          |
| Indoor marketplace   | Transport facility       | 0.12            | 0.23           | 1.000          |
|                      | Street                   | -0.17           | 0.23           | 1.000          |
|                      | Square                   | -0.19           | 0.24           | 1.000          |
|                      | Recreational space       | 0.37            | 0.23           | 0.910          |
|                      | Found neighborhood space | 0.42            | 0.24           | 0.858          |
|                      | Park                     | 0.16            | 0.24           | 1.000          |
|                      | Memorial                 | 1.20            | 0.24           | 0.000          |
|                      | Market                   | -0.01           | 0.24           | 1.000          |
|                      | Playground               | 0.13            | 0.23           | 1.000          |
|                      | Community open space     | -0.26           | 0.23           | 0.992          |
|                      | Waterfront               | -0.26           | 0.24           | 0.996          |
| Waterfront           | Transport facility       | 0.37            | 0.23           | 0.902          |
|                      | Street                   | 0.09            | 0.23           | 1.000          |
|                      | Square                   | 0.06            | 0.23           | 1.000          |
|                      | Recreational space       | 0.63            | 0.23           | 0.214          |
|                      | Found neighborhood space | 0.67            | 0.24           | 0.177          |
|                      | Park                     | 0.42            | 0.23           | 0.825          |
|                      | Memorial                 | 1.46            | 0.23           | 0.000          |
|                      | Market                   | 0.25            | 0.24           | 0.997          |
|                      | Playground               | 0.38            | 0.23           | 0.882          |
|                      | Community open space     | -0.01           | 0.23           | 1.000          |
|                      | Indoor marketplace       | 0.26            | 0.24           | 0.996          |
