# Supplementary material for: Effect of Street Performance (Busking) on the Environmental Perception of Public Space
Source: Front Psychol. 2021 Mar 30;12:647863. doi: 10.3389/fpsyg.2021.647863 (PMC8042224; doi:10.3389/fpsyg.2021.647863)
Supplement: Supplementary file 3 [file Data_Sheet_3.pdf]

## Appendix C

### Scale Items in Chinese

---

#### *Visitability*

如果我碰巧路過，我會在這個交匯點停留。  
我會特意到訪並在這個交匯點消磨時間。  
我會定期到訪這個交匯點。  
這個交匯點是一個我會選擇在此與朋友見面的地方。

---

#### *Restorativeness*

在這個交匯點，我會能夠集中精神。  
在這個交匯點，我會能夠專注於自己。  
在這個交匯點，我會能夠放鬆。  
在這個交匯點，我會能夠釋放所有壓力。  
在這個交匯點，我的精力會得到恢復。

---

#### *Preference*

我十分喜歡這個交匯點。  
我非常喜歡這個交匯點。  
我會很享受這個交匯點。  
我真的很享受這個交匯點。

---
